# Supplementary material for: Solvent-modulated metamagnetism in an Fe(ii) system exhibiting a two-step field-induced magnetic transition
Source: Royal Society of Chemistry journal article supplement (doi:10.1039/c2dt12260j), 2012-01-01
Supplement: c2dt12260j.pdf [file c2dt12260j.pdf]

## Supporting materials

### Solvent-modulated metamagnetism in a Fe(II) system exhibiting a two-step field-induced magnetic transition

Chun-Ding Zhou, Chao Chen, Li-Xuan Cai and Jie Zhang\*

*State Key Laboratory of Structural Chemistry, Fujian Institute of Research on the Structure of Matter, Chinese Academy of Sciences, Fuzhou, Fujian 350002, P. R. China. E-mail: zhangjie@fjirsm.ac.cn; Fax: (+86) 591-83710051*

\*\*\*\*\*

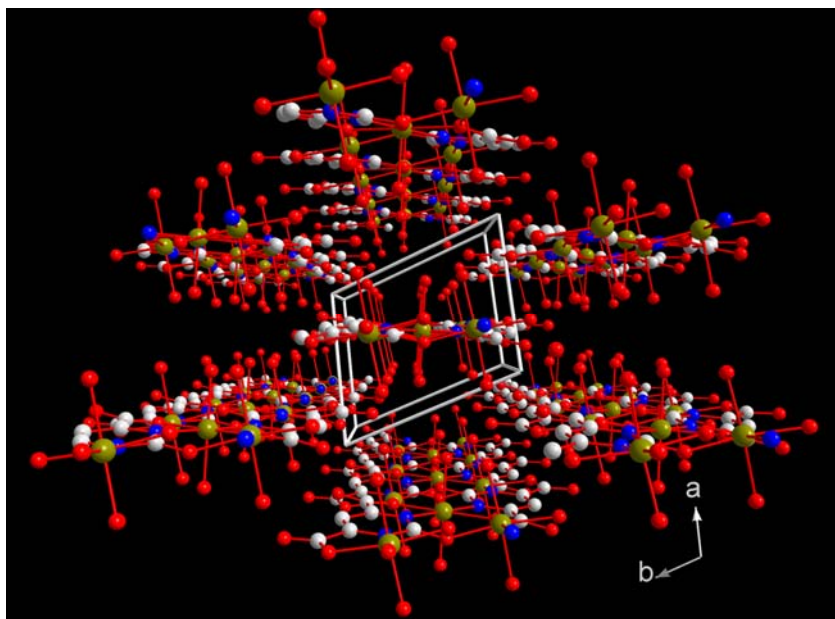

**Fig. S1** Ball-and-stick representation of the packing pattern for **1·Fe**.

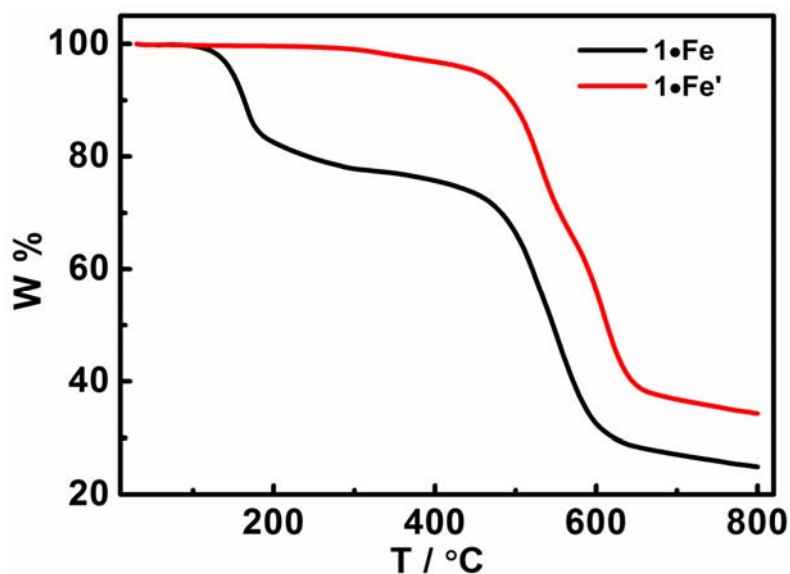

**Fig. S2** TG plots for **1·Fe**(black) and **1·Fe'**(red) measured in flowing N<sub>2</sub>.

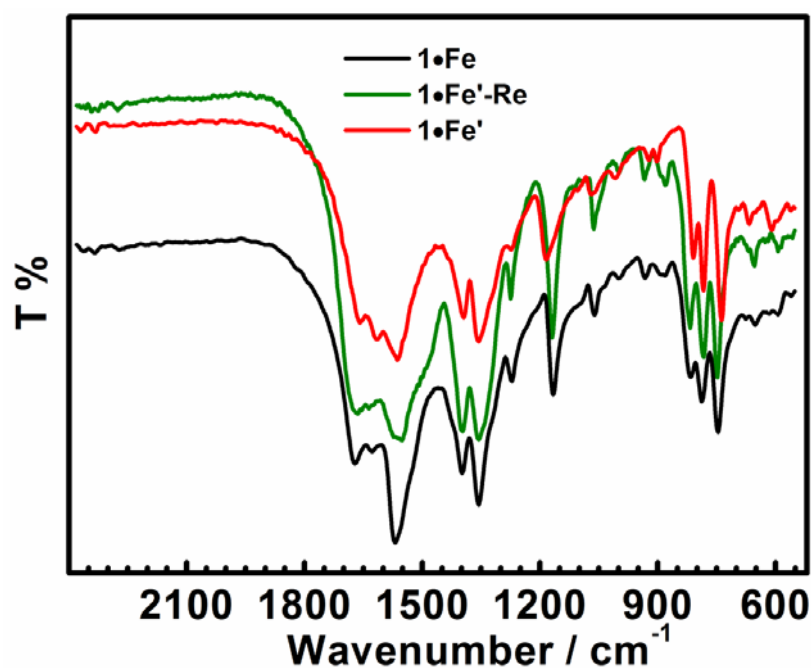

**Fig. S3** IR spectra recorded for the transformation from **1•Fe**(black) to **1•Fe'**(red) and back to **1•Fe'-Re**(olive).

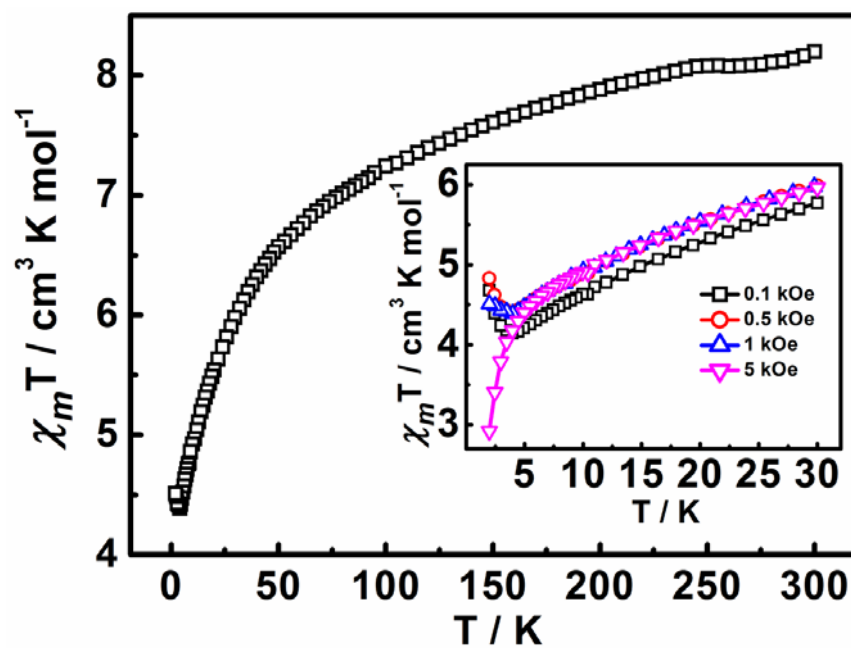

**Fig. S4** Plot of  $\chi_m T$  vs.  $T$  for **1•Fe'-Re** at 1 kOe. Inset: the blowup of the  $\chi_m T$  vs.  $T$  curves at low-temperature region under different external fields.
